# Supplementary material
Source: Springer Nature journal article supplement (https://www.springermedizin.de/resource/supplementary/12889_2012_4899_MOESM9_ESM.pdf/9492036)

### Ethiopia

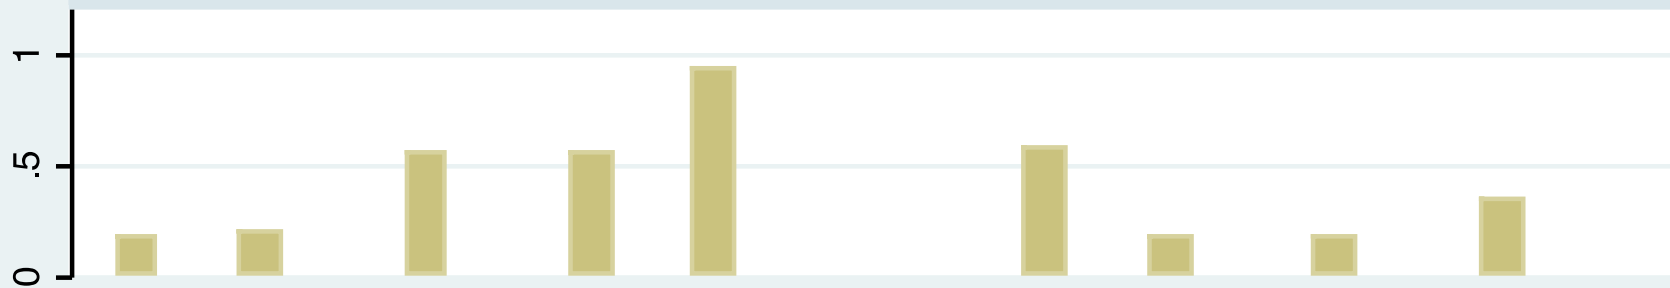

### India

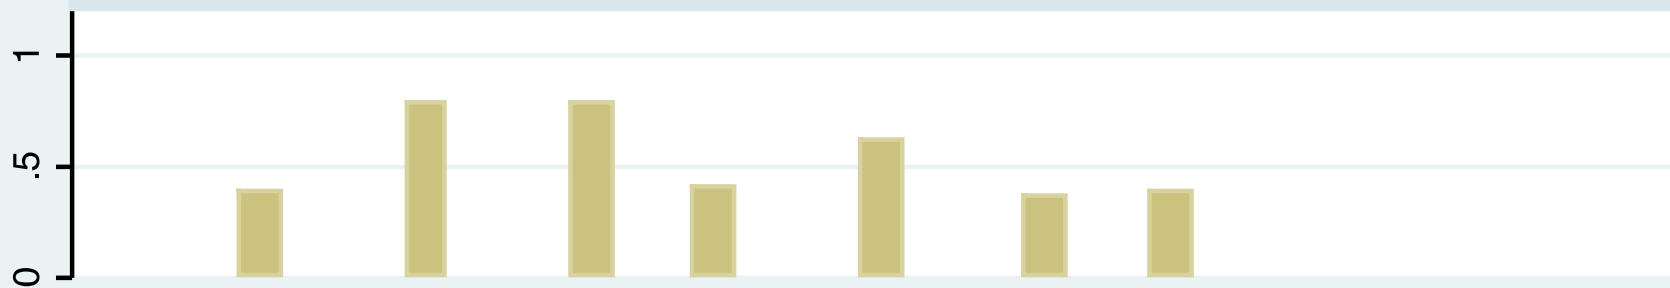

### Peru

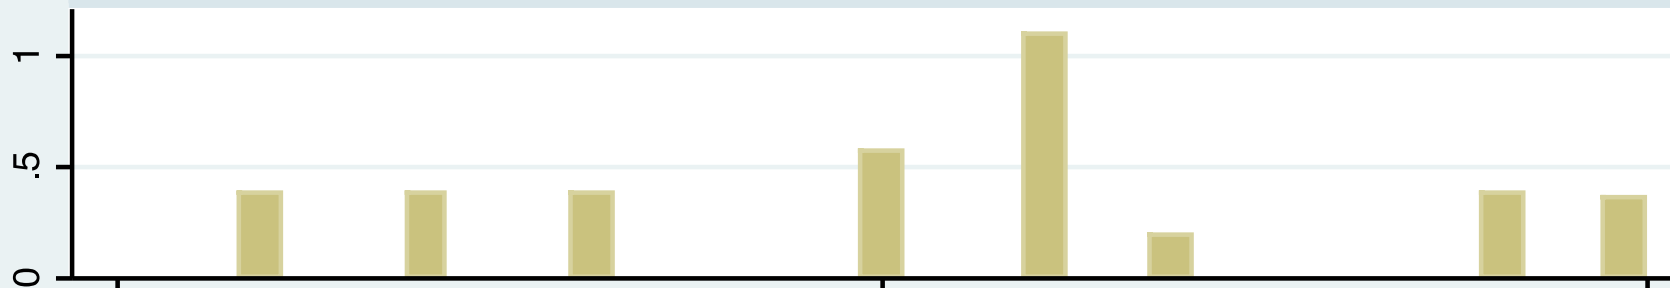

Health Services

Supplement: MOESM9 [file 9492036]
